# Supplementary material for: Bowel Preparation Is Associated with Reduced Morbidity in Elderly Patients Undergoing Elective Colectomy
Source: Springer Nature journal article supplement (doi:10.1007/s11605-016-3314-9), 2016-11-28
Supplement: MOESM1 [file 11101894]

**Supplemental Information:** Unadjusted rates of morbidity in elderly patients undergoing elective colectomy with anastomosis and without diversion stratified by the site of colectomy and indication for colectomy

Overall morbidity of right-sided colectomy with different indications for surgery in table

|  | Benign, Not Diverticulitis | Chronic Diverticular Disease | Colon Cancer | Inflammatory Bowel Disease |
| --- | --- | --- | --- | --- |
| Number of patients: | 346 | 13 | 1165 | 23 |
| Mortality (%): | 1.7 | 0.0 | 2.1 | 0.0 |
| Overall Morbidity (%): | 27.2 | 15.4 | 34.6 | 39.1 |
| Serious Morbidity (%): | 13.3 | 7.7 | 19.2 | 26.1 |
| Anastomotic Leak (%): | 2.9 | 0.0 | 2.5 | 4.4 |
| Ileus (%): | 12.8 | 7.7 | 16.7 | 26.1 |
| Post-op Sepsis (%): | 3.2 | 0.0 | 3.4 | 17.4 |
| Resp Compromise (%): | 5.5 | 7.7 | 4.9 | 8.7 |
| Superficial SSI (%): | 4.9 | 7.7 | 5.2 | 0.0 |
| Deep SSI (%): | 0.6 | 0.0 | 0.4 | 0.0 |
| Organ-Space SSI (%): | 2.6 | 7.7 | 2.8 | 4.4 |
| Readmission Rate (%): | 9.0 | 0.0 | 8.9 | 4.4 |
| Wound Dehiscence (%): | 0.0 | 7.7 | 0.9 | 0.0 |
| Any Renal Failure (%): | 1.2 | 0.0 | 1.0 | 4.4 |
| UTI (%): | 2.0 | 7.7 | 2.1 | 0.0 |
| Stroke (%): | 0.9 | 0.0 | 0.4 | 0.0 |
| Any Cardiac Event (%): | 1.5 | 0.0 | 2.2 | 4.4 |
| Bleeding Requiring Transfusion (%): | 6.9 | 0.0 | 13.3 | 13.0 |
| Any VTE (%): | 1.7 | 0.0 | 1.4 | 0.0 |

Overall morbidity of left-sided colectomy with different indications for surgery in table

|  | Benign, Not Diverticulitis | Chronic Diverticular Disease | Colon Cancer | Inflammatory Bowel Disease |
| --- | --- | --- | --- | --- |
| Number of patients: | 614 | 479 | 2176 | 12 |
| Mortality (%): | 1.1 | 0.8 | 1.4 | 0.0 |
| Overall Morbidity (%): | 25.9 | 30.1 | 30.3 | 16.7 |
| Serious Morbidity (%): | 12.2 | 16.5 | 18.1 | 0.0 |
| Anastomotic Leak (%): | 3.1 | 2.5 | 3.4 | 0.0 |
| Ileus (%): | 11.0 | 11.5 | 12.5 | 16.7 |
| Post-op Sepsis (%): | 4.1 | 4.4 | 3.5 | 0.0 |
| Resp Compromise (%): | 3.3 | 1.9 | 4.4 | 0.0 |
| Superficial SSI (%): | 4.4 | 6.7 | 2.7 | 0.0 |
| Deep SSI (%): | 0.8 | 0.4 | 0.8 | 0.0 |
| Organ-Space SSI (%): | 2.4 | 3.8 | 2.7 | 0.0 |
| Readmission Rate (%): | 7.9 | 8.4 | 9.6 | 0.0 |
| Wound Dehiscence (%): | 0.3 | 1.5 | 0.7 | 0.0 |
| Any Renal Failure (%): | 0.7 | 0.4 | 0.9 | 0.0 |
| UTI (%): | 2.9 | 5.2 | 3.1 | 0.0 |
| Stroke (%): | 0.2 | 0.0 | 0.5 | 0.0 |
| Any Cardiac Event (%): | 2.1 | 0.8 | 1.5 | 0.0 |
| Bleeding Requiring Transfusion (%): | 5.4 | 7.5 | 11.4 | 0.0 |
| Any VTE (%): | 1.1 | 0.8 | 1.2 | 0.0 |

Right-sided colectomy with indication for surgery of benign, not related to diverticulitis

|  | No Bowel Prep | MBP Only | OABP Only | MBP+OABP | p-value |
| --- | --- | --- | --- | --- | --- |
| Number of patients: | 131 | 108 | 13 | 94 |  |
| Mortality (%): | 0.8 | 2.8 | 7.7 | 1.1 | 0.22 |
| Overall Morbidity (%): | 26.7 | 27.8 | 30.8 | 26.6 | 0.99 |
| Serious Morbidity (%): | 12.2 | 12.0 | 23.1 | 14.9 | 0.67 |
| Anastomotic Leak (%): | 1.6 | 2.8 | 7.7 | 4.3 | 0.47 |
| Ileus (%): | 13.2 | 12.0 | 23.1 | 11.7 | 0.70 |
| Post-op Sepsis (%): | 2.3 | 3.7 | 7.7 | 3.2 | 0.73 |
| Resp Compromise (%): | 5.3 | 5.6 | 7.7 | 5.3 | 0.99 |
| Superficial SSI (%): | 4.6 | 6.5 | 7.7 | 3.2 | 0.70 |
| Deep SSI (%): | 0.8 | 0.0 | 0.0 | 1.1 | 0.76 |
| Organ-Space SSI (%): | 0.8 | 2.8 | 7.7 | 4.3 | 0.25 |
| Readmission Rate (%): | 6.2 | 11.1 | 0.0 | 11.7 | 0.26 |
| Wound Dehiscence (%): | 0.0 | 0.0 | 0.0 | 0.0 | 1.00 |
| Any Renal Failure (%): | 1.5 | 0.9 | 0.0 | 1.1 | 0.95 |
| UTI (%): | 2.3 | 2.8 | 0.0 | 1.1 | 0.79 |
| Stroke (%): | 0.8 | 0.9 | 0.0 | 1.1 | 0.98 |
| Any Cardiac Event (%): | 0.0 | 0.9 | 15.4 | 2.1 | <0.01 |
| Bleeding Requiring Transfusion (%): | 8.4 | 5.6 | 7.7 | 6.4 | 0.85 |
| Any VTE (%): | 0.0 | 1.9 | 0.0 | 4.3 | 0.11 |

Left-sided colectomy with indication for surgery of benign, not related to diverticulitis

|  | No Bowel Prep | MBP Only | OABP Only | MBP+OABP | p-value |
| --- | --- | --- | --- | --- | --- |
| Number of patients: | 164 | 248 | 25 | 177 |  |
| Mortality (%): | 1.2 | 0.8 | 0.0 | 1.7 | 0.80 |
| Overall Morbidity (%): | 29.3 | 26.6 | 20.0 | 22.6 | 0.48 |
| Serious Morbidity (%): | 12.8 | 11.7 | 20.0 | 11.3 | 0.64 |
| Anastomotic Leak (%): | 3.1 | 4.1 | 4.0 | 1.7 | 0.59 |
| Ileus (%): | 15.3 | 9.7 | 4.0 | 9.7 | 0.16 |
| Post-op Sepsis (%): | 6.1 | 2.8 | 4.0 | 4.0 | 0.44 |
| Resp Compromise (%): | 5.5 | 2.4 | 4.0 | 2.3 | 0.29 |
| Superficial SSI (%): | 4.9 | 5.7 | 0.0 | 2.8 | 0.36 |
| Deep SSI (%): | 1.2 | 0.8 | 0.0 | 0.6 | 0.88 |
| Organ-Space SSI (%): | 1.8 | 3.2 | 4.0 | 1.7 | 0.67 |
| Readmission Rate (%): | 6.8 | 7.3 | 12.0 | 9.1 | 0.73 |
| Wound Dehiscence (%): | 1.2 | 0.0 | 0.0 | 0.0 | 0.14 |
| Any Renal Failure (%): | 0.6 | 0.8 | 0.0 | 0.6 | 0.96 |
| UTI (%): | 3.1 | 2.8 | 0.0 | 3.4 | 0.82 |
| Stroke (%): | 0.6 | 0.0 | 0.0 | 0.0 | 0.43 |
| Any Cardiac Event (%): | 3.1 | 1.2 | 4.0 | 2.3 | 0.55 |
| Bleeding Requiring Transfusion (%): | 3.7 | 5.2 | 12.0 | 6.2 | 0.34 |
| Any VTE (%): | 1.2 | 0.8 | 4.0 | 1.1 | 0.56 |

Right-sided colectomy with indication for surgery of chronic diverticulitis. Note, only 13 patients fell into this stratum and no patients in this stratum had OABP only.

|  | No Bowel Prep | MBP Only | OABP Only | MBP+OABP | p-value |
| --- | --- | --- | --- | --- | --- |
| Number of patients: | 3 | 7 | 0 | 3 |  |
| Mortality (%): | 0.0 | 0.0 | 0.0 | 0.0 | 1.00 |
| Overall Morbidity (%): | 33.3 | 14.3 | 0.0 | 0.0 | 1.00 |
| Serious Morbidity (%): | 33.3 | 0.0 | 0.0 | 0.0 | 0.42 |
| Anastomotic Leak (%): | 0.0 | 0.0 | 0.0 | 0.0 | 1.00 |
| Ileus (%): | 33.3 | 0.0 | 0.0 | 0.0 | 0.46 |
| Post-op Sepsis (%): | 0.0 | 0.0 | 0.0 | 0.0 | 1.00 |
| Resp Compromise (%): | 0.0 | 14.3 | 0.0 | 0.0 | 1.00 |
| Superficial SSI (%): | 0.0 | 14.3 | 0.0 | 0.0 | 1.00 |
| Deep SSI (%): | 0.0 | 0.0 | 0.0 | 0.0 | 1.00 |
| Organ-Space SSI (%): | 33.3 | 0.0 | 0.0 | 0.0 | 0.46 |
| Readmission Rate (%): | 0.0 | 0.0 | 0.0 | 0.0 | 1.00 |
| Wound Dehiscence (%): | 33.3 | 0.0 | 0.0 | 0.0 | 0.46 |
| Any Renal Failure (%): | 0.0 | 0.0 | 0.0 | 0.0 | 1.00 |
| UTI (%): | 33.3 | 0.0 | 0.0 | 0.0 | 0.46 |
| Stroke (%): | 0.0 | 0.0 | 0.0 | 0.0 | 1.00 |
| Any Cardiac Event (%): | 0.0 | 0.0 | 0.0 | 0.0 | 1.00 |
| Bleeding Requiring Transfusion (%): | 0.0 | 0.0 | 0.0 | 0.0 | 1.00 |
| Any VTE (%): | 0.0 | 0.0 | 0.0 | 0.0 | 1.00 |

Left-sided colectomy with indication for surgery of chronic diverticulitis

|  | No Bowel Prep | MBP Only | OABP Only | MBP+OABP | p-value |
| --- | --- | --- | --- | --- | --- |
| Number of patients: | 95 | 189 | 16 | 179 |  |
| Mortality (%): | 3.2 | 0.5 | 0.0 | 0.0 | 0.05 |
| Overall Morbidity (%): | 37.9 | 32.3 | 18.8 | 24.6 | 0.08 |
| Serious Morbidity (%): | 21.1 | 17.5 | 12.5 | 13.4 | 0.39 |
| Anastomotic Leak (%): | 3.2 | 3.2 | 0.0 | 1.7 | 0.70 |
| Ileus (%): | 12.6 | 15.4 | 6.3 | 7.3 | 0.09 |
| Post-op Sepsis (%): | 7.4 | 5.8 | 0.0 | 1.7 | 0.08 |
| Resp Compromise (%): | 5.3 | 1.6 | 0.0 | 0.6 | 0.05 |
| Superficial SSI (%): | 11.6 | 4.8 | 6.3 | 6.2 | 0.18 |
| Deep SSI (%): | 0.0 | 1.1 | 0.0 | 0.0 | 0.38 |
| Organ-Space SSI (%): | 5.3 | 4.8 | 0.0 | 2.2 | 0.41 |
| Readmission Rate (%): | 10.6 | 9.5 | 12.5 | 5.6 | 0.37 |
| Wound Dehiscence (%): | 2.1 | 1.6 | 0.0 | 1.1 | 0.88 |
| Any Renal Failure (%): | 0.0 | 1.1 | 0.0 | 0.0 | 0.38 |
| UTI (%): | 2.1 | 8.5 | 0.0 | 3.9 | 0.06 |
| Stroke (%): | 0.0 | 0.0 | 0.0 | 0.0 | 1.00 |
| Any Cardiac Event (%): | 1.1 | 1.1 | 0.0 | 0.6 | 0.93 |
| Bleeding Requiring Transfusion (%): | 8.4 | 6.9 | 6.3 | 7.8 | 0.96 |
| Any VTE (%): | 1.1 | 1.1 | 6.3 | 0.0 | 0.06 |

Right-sided colectomy with indication for surgery of colon cancer.

|  | No Bowel Prep | MBP Only | OABP Only | MBP+OABP | p-value |
| --- | --- | --- | --- | --- | --- |
| Number of patients: | 453 | 389 | 28 | 295 |  |
| Mortality (%): | 2.2 | 2.3 | 0.0 | 1.7 | 0.81 |
| Overall Morbidity (%): | 42.6 | 29.3 | 28.6 | 29.8 | <0.01 |
| Serious Morbidity (%): | 22.3 | 16.7 | 10.7 | 18.6 | 0.13 |
| Anastomotic Leak (%): | 3.8 | 1.5 | 0.0 | 2.0 | 0.14 |
| Ileus (%): | 21.7 | 12.9 | 21.4 | 13.6 | <0.01 |
| Post-op Sepsis (%): | 4.4 | 3.1 | 0.0 | 2.7 | 0.40 |
| Resp Compromise (%): | 6.4 | 4.6 | 3.6 | 3.1 | 0.21 |
| Superficial SSI (%): | 8.0 | 5.1 | 0.0 | 1.7 | <0.01 |
| Deep SSI (%): | 0.0 | 0.5 | 3.6 | 0.7 | 0.03 |
| Organ-Space SSI (%): | 4.4 | 1.8 | 0.0 | 2.0 | 0.07 |
| Readmission Rate (%): | 8.4 | 8.2 | 10.7 | 10.5 | 0.71 |
| Wound Dehiscence (%): | 0.4 | 1.3 | 0.0 | 1.0 | 0.55 |
| Any Renal Failure (%): | 0.7 | 1.0 | 0.0 | 1.7 | 0.54 |
| UTI (%): | 2.2 | 2.8 | 0.0 | 1.0 | 0.34 |
| Stroke (%): | 0.4 | 0.3 | 0.0 | 0.7 | 0.84 |
| Any Cardiac Event (%): | 2.4 | 2.1 | 7.1 | 1.4 | 0.22 |
| Bleeding Requiring Transfusion (%): | 15.9 | 11.1 | 10.7 | 12.5 | 0.20 |
| Any VTE (%): | 1.3 | 1.5 | 0.0 | 1.4 | 0.92 |

Left-sided colectomy with indication for surgery of colon cancer

|  | No Bowel Prep | MBP Only | OABP Only | MBP+OABP | p-value |
| --- | --- | --- | --- | --- | --- |
| Number of patients: | 636 | 840 | 68 | 632 |  |
| Mortality (%): | 1.9 | 1.7 | 0.0 | 0.6 | 0.15 |
| Overall Morbidity (%): | 31.0 | 36.2 | 25.0 | 22.5 | <0.01 |
| Serious Morbidity (%): | 17.6 | 21.9 | 14.7 | 13.8 | <0.01 |
| Anastomotic Leak (%): | 4.3 | 4.1 | 0.0 | 1.9 | 0.02 |
| Ileus (%): | 13.1 | 15.2 | 7.4 | 8.7 | <0.01 |
| Post-op Sepsis (%): | 4.1 | 4.4 | 1.5 | 1.9 | 0.04 |
| Resp Compromise (%): | 5.7 | 4.8 | 4.4 | 2.5 | 0.05 |
| Superficial SSI (%): | 3.6 | 3.0 | 2.9 | 1.3 | 0.06 |
| Deep SSI (%): | 1.1 | 0.8 | 0.0 | 0.5 | 0.54 |
| Organ-Space SSI (%): | 3.1 | 3.5 | 1.5 | 1.4 | 0.09 |
| Readmission Rate (%): | 9.3 | 10.7 | 1.5 | 9.3 | 0.09 |
| Wound Dehiscence (%): | 0.6 | 1.2 | 0.0 | 0.2 | 0.10 |
| Any Renal Failure (%): | 1.1 | 1.2 | 0.0 | 0.5 | 0.41 |
| UTI (%): | 2.7 | 3.7 | 0.0 | 3.2 | 0.32 |
| Stroke (%): | 0.5 | 0.6 | 0.0 | 0.3 | 0.82 |
| Any Cardiac Event (%): | 1.9 | 1.6 | 0.0 | 1.3 | 0.59 |
| Bleeding Requiring Transfusion (%): | 10.5 | 13.1 | 13.2 | 9.7 | 0.17 |
| Any VTE (%): | 0.8 | 1.1 | 0.0 | 1.7 | 0.32 |

Right-sided colectomy with indication for surgery of inflammatory bowel disease. Note, only 23 patients fell into this stratum.

|  | No Bowel Prep | MBP Only | OABP Only | MBP+OABP | p-value |
| --- | --- | --- | --- | --- | --- |
| Number of patients: | 23 | 14 | 3 | 10 |  |
| Mortality (%): | 0.0 | 0.0 | 0.0 | 0.0 | 1.00 |
| Overall Morbidity (%): | 44.4 | 25.0 | 33.3 | 42.9 | 1.00 |
| Serious Morbidity (%): | 44.4 | 0.0 | 0.0 | 28.6 | 0.34 |
| Anastomotic Leak (%): | 11.1 | 0.0 | 0.0 | 0.0 | 1.00 |
| Ileus (%): | 22.2 | 25.0 | 33.3 | 28.6 | 1.00 |
| Post-op Sepsis (%): | 44.4 | 0.0 | 0.0 | 0.0 | 0.11 |
| Resp Compromise (%): | 22.2 | 0.0 | 0.0 | 0.0 | 0.75 |
| Superficial SSI (%): | 0.0 | 0.0 | 0.0 | 0.0 | 1.00 |
| Deep SSI (%): | 0.0 | 0.0 | 0.0 | 0.0 | 1.00 |
| Organ-Space SSI (%): | 11.1 | 0.0 | 0.0 | 0.0 | 1.00 |
| Readmission Rate (%): | 11.1 | 0.0 | 0.0 | 0.0 | 1.00 |
| Wound Dehiscence (%): | 0.0 | 0.0 | 0.0 | 0.0 | 1.00 |
| Any Renal Failure (%): | 0.0 | 0.0 | 0.0 | 14.3 | 0.61 |
| UTI (%): | 0.0 | 0.0 | 0.0 | 0.0 | 1.00 |
| Stroke (%): | 0.0 | 0.0 | 0.0 | 0.0 | 1.00 |
| Any Cardiac Event (%): | 0.0 | 0.0 | 0.0 | 14.3 | 0.61 |
| Bleeding Requiring Transfusion (%): | 22.2 | 0.0 | 0.0 | 14.3 | 1.00 |
| Any VTE (%): | 0.0 | 0.0 | 0.0 | 0.0 | 1.00 |

Left-sided colectomy with indication for surgery of inflammatory bowel disease. Note, only 12 patients fell into this stratum and no patients in this stratum had OABP only.

|  | No Bowel Prep | MBP Only | OABP Only | MBP+OABP | p-value |
| --- | --- | --- | --- | --- | --- |
| Number of patients: | 6 | 3 | 0 | 3 |  |
| Mortality (%): | 0.0 | 0.0 | 0.0 | 0.0 | 1.00 |
| Overall Morbidity (%): | 0.0 | 66.7 | 0.0 | 0.0 | 0.09 |
| Serious Morbidity (%): | 0.0 | 0.0 | 0.0 | 0.0 | 1.00 |
| Anastomotic Leak (%): | 0.0 | 0.0 | 0.0 | 0.0 | 1.00 |
| Ileus (%): | 0.0 | 66.7 | 0.0 | 0.0 | 0.09 |
| Post-op Sepsis (%): | 0.0 | 0.0 | 0.0 | 0.0 | 1.00 |
| Resp Compromise (%): | 0.0 | 0.0 | 0.0 | 0.0 | 1.00 |
| Superficial SSI (%): | 0.0 | 0.0 | 0.0 | 0.0 | 1.00 |
| Deep SSI (%): | 0.0 | 0.0 | 0.0 | 0.0 | 1.00 |
| Organ-Space SSI (%): | 0.0 | 0.0 | 0.0 | 0.0 | 1.00 |
| Readmission Rate (%): | 0.0 | 0.0 | 0.0 | 0.0 | 1.00 |
| Wound Dehiscence (%): | 0.0 | 0.0 | 0.0 | 0.0 | 1.00 |
| Any Renal Failure (%): | 0.0 | 0.0 | 0.0 | 0.0 | 1.00 |
| UTI (%): | 0.0 | 0.0 | 0.0 | 0.0 | 1.00 |
| Stroke (%): | 0.0 | 0.0 | 0.0 | 0.0 | 1.00 |
| Any Cardiac Event (%): | 0.0 | 0.0 | 0.0 | 0.0 | 1.00 |
| Bleeding Requiring Transfusion (%): | 0.0 | 0.0 | 0.0 | 0.0 | 1.00 |
| Any VTE (%): | 0.0 | 0.0 | 0.0 | 0.0 | 1.00 |
